# Supplementary material for: Extra Virgin Olive Oil Extracts Modulate the Inflammatory Ability of Murine Dendritic Cells Based on Their Polyphenols Pattern: Correlation between Chemical Composition and Biological Function
Source: MDPI journal article supplement (doi:10.3390/antiox10071016), 2021-06-24
Supplement: s1 [file s1]

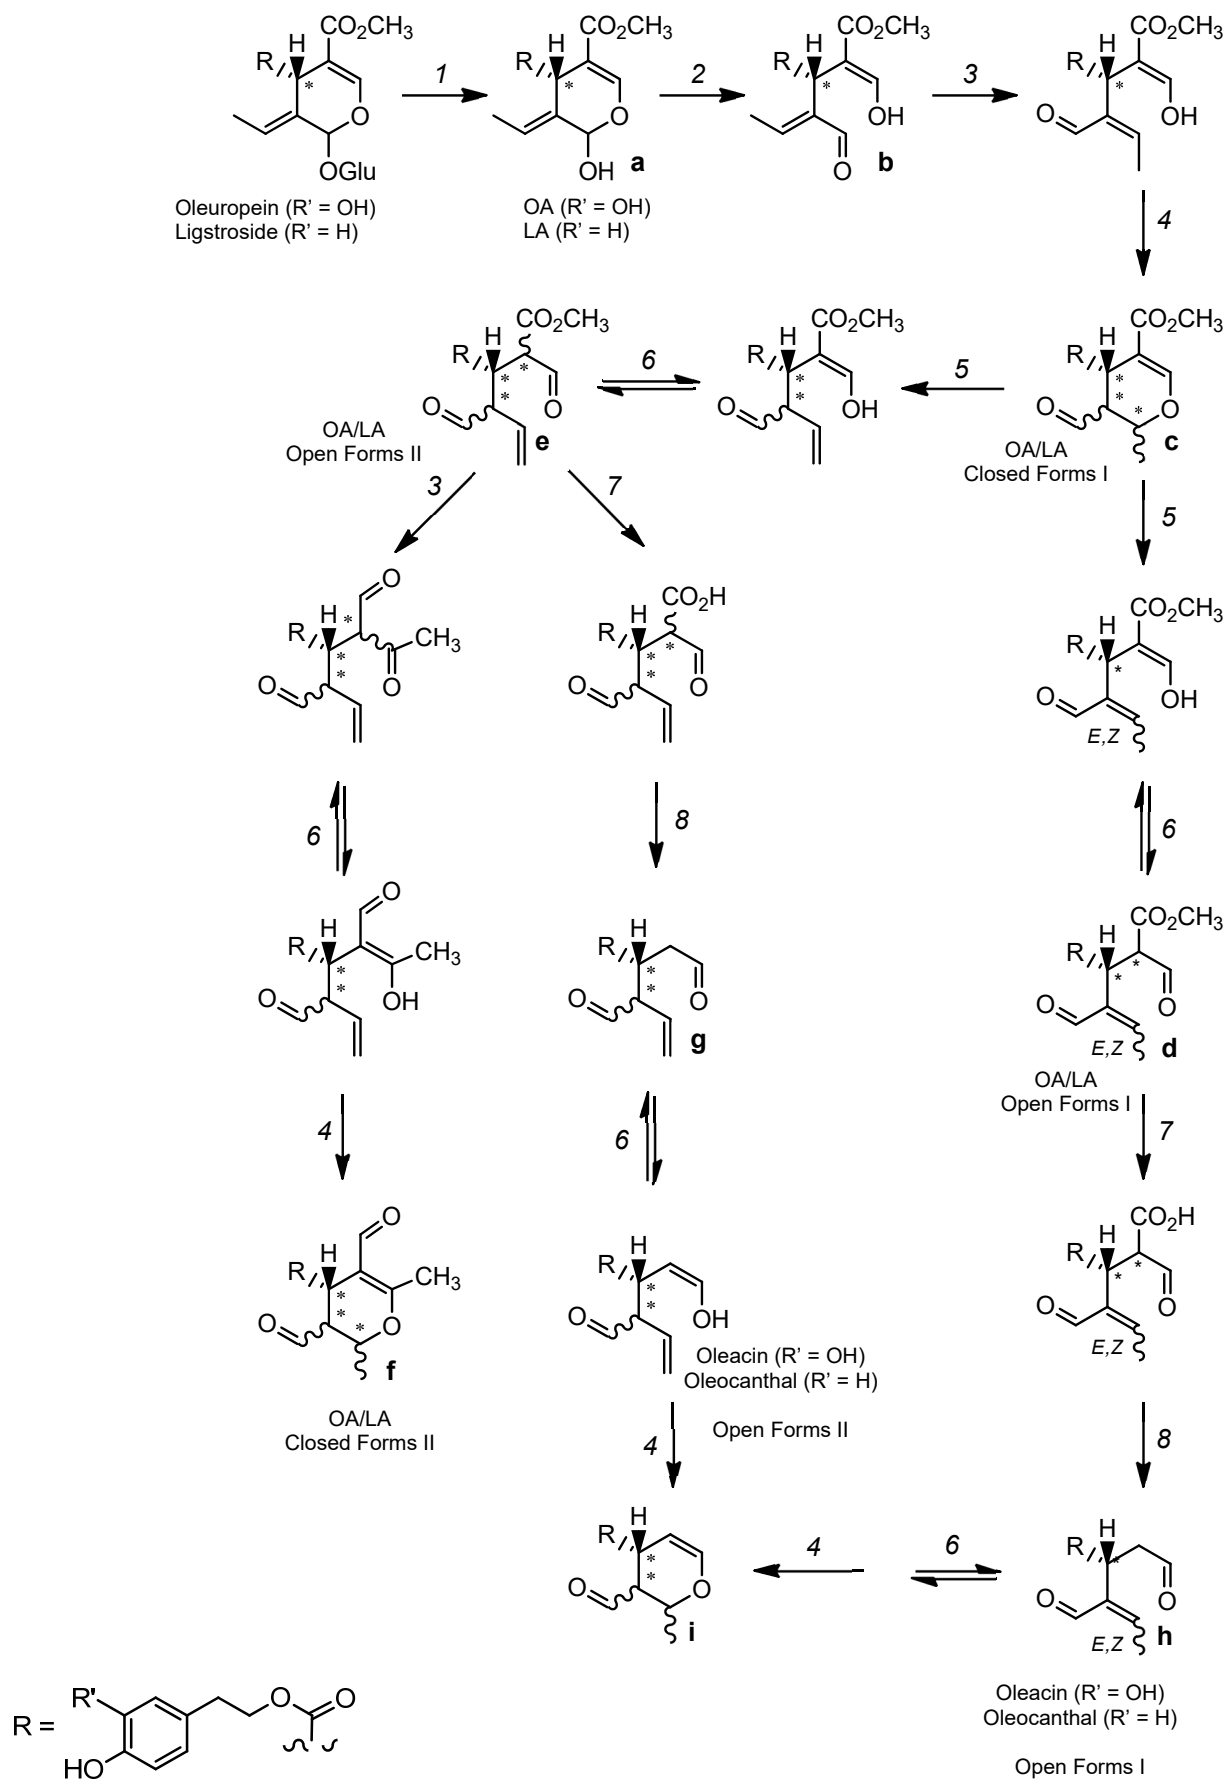

**Figure S1.** Sequence of enzymatic and chemical processes leading from the main secoiridoids (i.e, oleuropein and ligstroside) contained in olive drupes to the different isomers, named Open/Closed Forms I and II, of major secoiridoids found in EVOO: oleuropein (OA) and ligstroside (LA) aglycones, oleocanthal and oleacin.

1, hydrolysis catalyzed by  $\beta$ -glucosidase; 2, hemiacetal hydrolysis; 3, C-C rotation; 4, 1,4-Michael addition; 5, acid hydrolysis at pH 3-5; 6, keto-enolic tautomerism; 7, demethylation catalyzed by methylsterase; 8, decarboxylation.

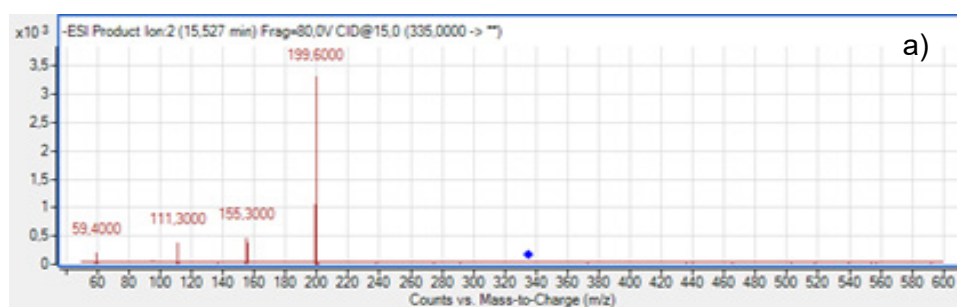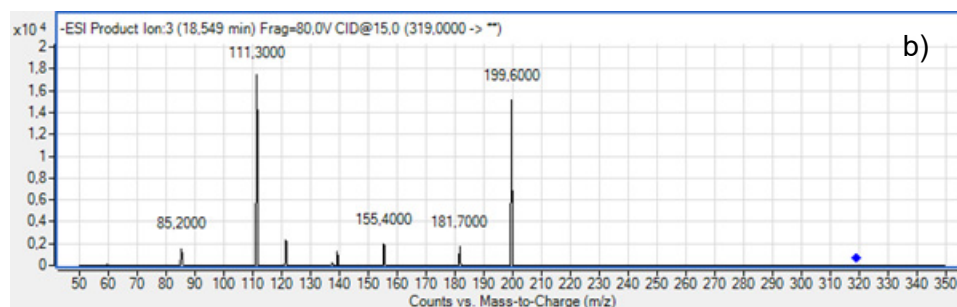

**Figure S2.** MS/MS spectra of oleacinic acid (a) and oleocanthalic acid (b).

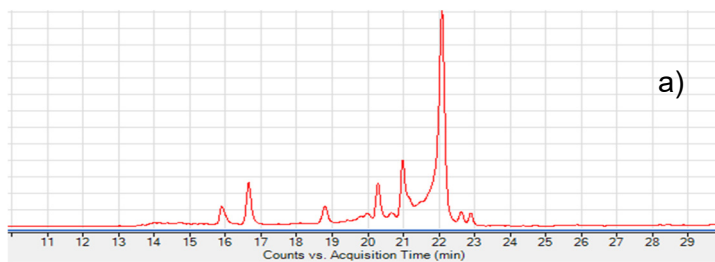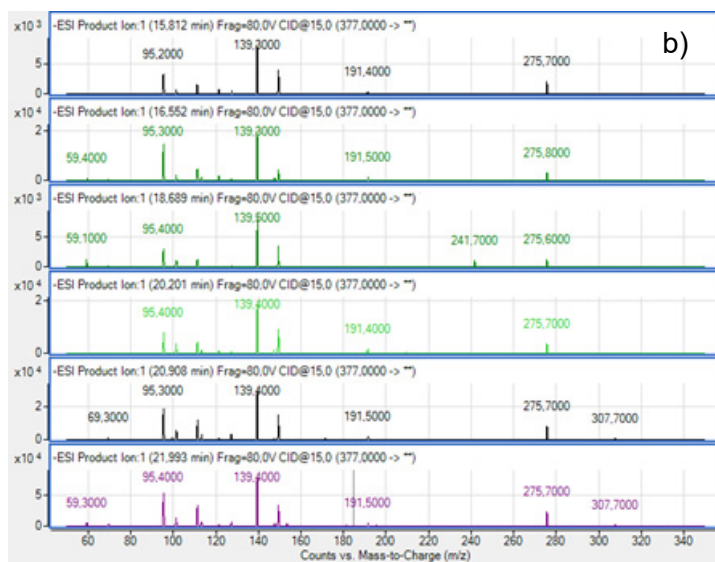

**Figure S3.** Extracted ion chromatogram (EIC) (a) and MS/MS spectra of oleuropein aglycone (b) at  $[M-H]^-$  377.

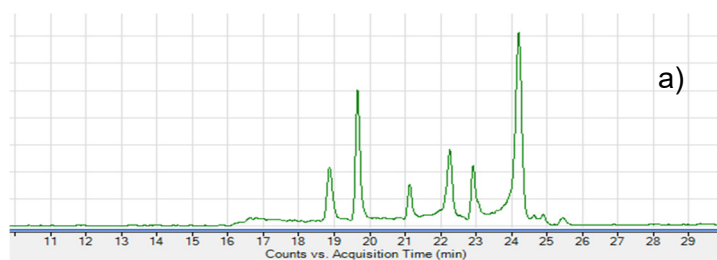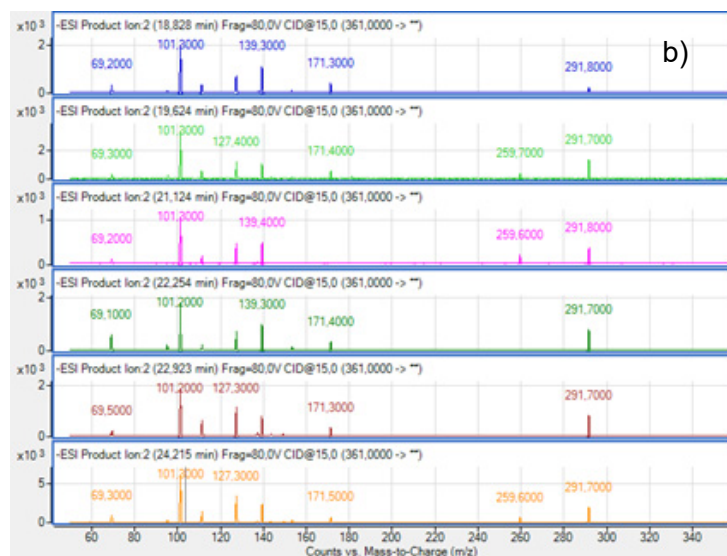

**Figure S4.** Extracted ion chromatogram (EIC) (a) and MS/MS spectra of ligstroside aglycone (b) at  $[M-H]^-$  361.

**Table S1:** Acquisition parameters for MRM UHPLC-MS/MS analyses.

| compound                                                                     | Q <sub>1</sub><br>(m/z) | Q <sub>3</sub><br>(m/z) | Frag<br>(V) | CE<br>(V) | Polarity |
|------------------------------------------------------------------------------|-------------------------|-------------------------|-------------|-----------|----------|
| Hydroxy-tyrosol                                                              | 153                     | 123                     | 100         | 15        | negative |
| Decarboxymethyl-elenolic acid derivative                                     | 185                     | 111                     | 100         | 15        | negative |
| Hydroxylated product of dialdehydic form of<br>decarboxymethyl elenolic acid | 199                     | 111                     | 100         | 15        | negative |
| Tyrosol                                                                      | 137                     | 119                     | 80          | 15        | negative |
| Decarboxymethyl 10-hydroxy oleuropein aglycone                               | 335                     | 199                     | 80          | 15        | negative |
| Hydroxy-oleuropein aglycone isomer 1                                         | 393                     | 169                     | 80          | 15        | negative |
| Oleuropein isomer 1                                                          | 539                     | 113                     | 80          | 15        | negative |
| Pinoresinol                                                                  | 357                     | 221                     | 80          | 15        | negative |
| Oleuropein aglycone isomer 1                                                 | 377                     | 139                     | 80          | 15        | negative |
| Oleuropein aglycone isomer 2                                                 | 377                     | 139                     | 80          | 15        | negative |
| Hydroxy-oleuropein aglycone isomer 2                                         | 393                     | 169                     | 80          | 15        | negative |
| Oleuropein isomer 2                                                          | 539                     | 113                     | 80          | 15        | negative |
| Oleacein                                                                     | 319                     | 111                     | 80          | 15        | negative |
| Oleuropein aglycone isomer 3                                                 | 377                     | 139                     | 80          | 15        | negative |
| Ligstroside aglycone isomer 1                                                | 361                     | 101                     | 80          | 15        | negative |
| Luteolin                                                                     | 285                     | 133                     | 100         | 30        | negative |
| Hydroxy-oleuropein aglycone isomer 3                                         | 393                     | 169                     | 80          | 15        | negative |
| Acetoxy pinoresinol                                                          | 415                     | 136                     | 100         | 30        | negative |
| Hydroxy-methyl decarboxymethyl ligstroside aglycone<br>isomer 1              | 333                     | 111                     | 80          | 15        | negative |
| Ligstroside aglycone isomer 2                                                | 361                     | 101                     | 80          | 15        | negative |
| Hydroxy-oleuropein aglycone isomer 4                                         | 393                     | 169                     | 80          | 15        | negative |
| Hydroxy-methyl decarboxymethyl ligstroside aglycone<br>isomer 2              | 333                     | 111                     | 80          | 15        | negative |
| Oleuropein aglycone isomer 4                                                 | 377                     | 139                     | 80          | 15        | negative |
| Hydroxy-methyl decarboxymethyl ligstroside aglycone<br>isomer 3              | 333                     | 111                     | 80          | 15        | negative |

|                                             |     |     |     |    |          |
|---------------------------------------------|-----|-----|-----|----|----------|
| Oleuropein aglycone isomer 5                | 377 | 139 | 80  | 15 | negative |
| Monoaldehydic ligstroside aglycone isomer 1 | 361 | 101 | 80  | 15 | negative |
| Apigenin                                    | 269 | 117 | 100 | 30 | negative |
| Methoxyluteolin                             | 299 | 227 | 100 | 30 | negative |
| Monoaldehydic oleuropein aglycone           | 377 | 139 | 80  | 15 | negative |
| Ligstroside aglycone isomer 3               | 361 | 101 | 80  | 15 | negative |
| Ligstroside aglycone isomer 4               | 361 | 101 | 80  | 15 | negative |
| Monoaldehydic ligstroside aglycone isomer 2 | 361 | 101 | 80  | 15 | negative |

Q<sub>1</sub>, parent ion mass; Q<sub>3</sub>, daughter ion mass; Frag, fragmentor voltage; CE, collision energy.
